# Supplementary material for: The Possible Role of the Type I Chaperonins in Human Insulin Self-Association
Source: MDPI journal article supplement (doi:10.3390/life12030448), 2022-03-18
Supplement: s1 [file s1]

# The Possible Role of the Type I Chaperonins in Human Insulin Self-association

Federica Pizzo, Maria Rosalia Mangione, Fabio Librizzi, Mauro Manno, Vincenzo Martorana, Rosina Noto and Silvia Vilasi

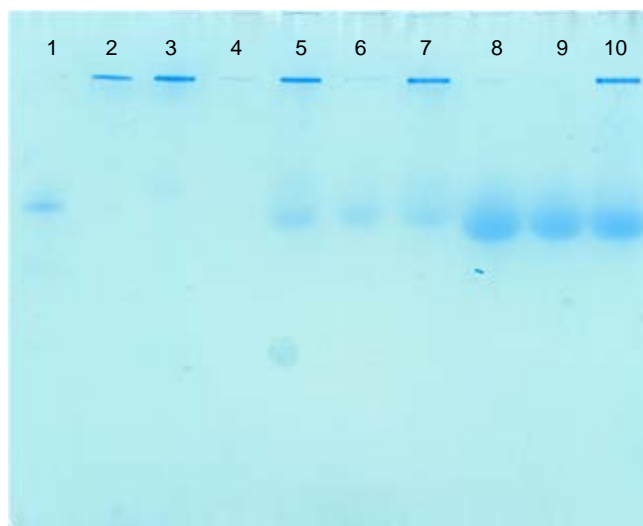

**Figure S1:** Original non denaturing PAGE used for composing the figure 4 of the manuscript. In particular the columns 1, 2, 3, 4, 5, 9, 10 used for the figure are 1: a human neuroserpin with molecular mass of 46kDa was used as a reference; 2: GroEL at 1.7  $\mu$ M; 3: GroEL/GroES mixture in a molar ratio 1:1 at 1.7  $\mu$ M; 4: insulin at 0.1 mg/ml (17  $\mu$ M); 5: insulin at 0.1 mg/ml (17  $\mu$ M) with GroEL/GroES in a molar ratio GroEL:insulin=1:10. 9: insulin at 0.5 mg/ml (86  $\mu$ M); 10: insulin at 0.5 mg/ml (86  $\mu$ M) with GroEL/GROES in a molar ratio GroEL:insulin=1:10.

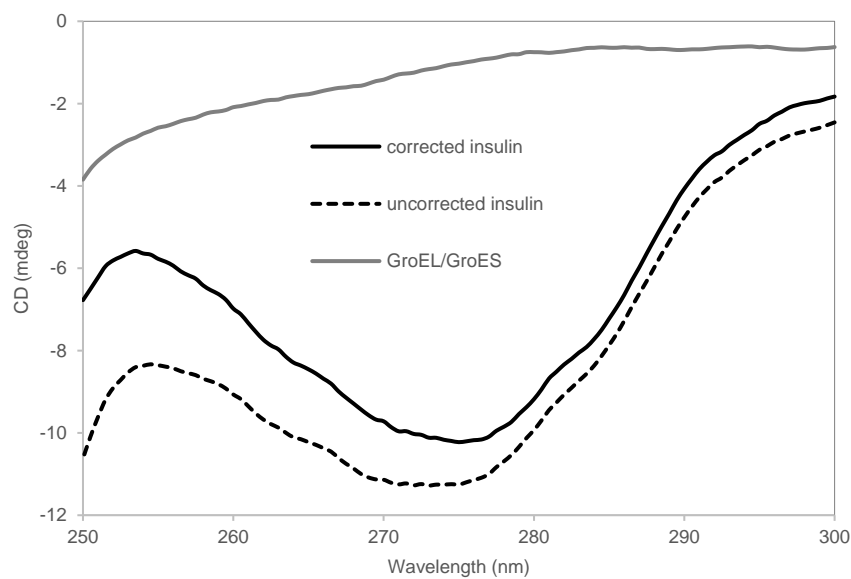

**Figure S2:** Near-UV CD spectra of insulin at 0.5 mg/ml (86  $\mu$ M) in the presence of the chaperonins GroEL/GroES in a molar ratio insulin:(GroEL:GroES)=10:(1:1) and uncorrected for the corresponding chaperonins signal (dashed black line). In the same graph, the spectrum relative to GroEL/GroES (GroEL 8.6  $\mu$ M) is reported (grey), together with the spectrum obtained for insulin after the subtraction of the chaperonins signal from the uncorrected spectrum (continuous black).
